# Supplementary material for: One Health Investigation of SARS-CoV-2 Infection and Seropositivity among Pets in Households with Confirmed Human COVID-19 Cases—Utah and Wisconsin, 2020
Source: MDPI journal article supplement (doi:10.3390/v13091813), 2021-09-12
Supplement: s1 [file s1]

Supplementary Files

One Health Investigation of SARS-CoV-2 Infection and Seropositivity among Pets in Households with Confirmed Human COVID-19 Cases — Utah and Wisconsin, 2020

Figure S1. Enrollment and sampling of household pets in the One Health COVID-19 Household Transmission Investigation, April–May 2020

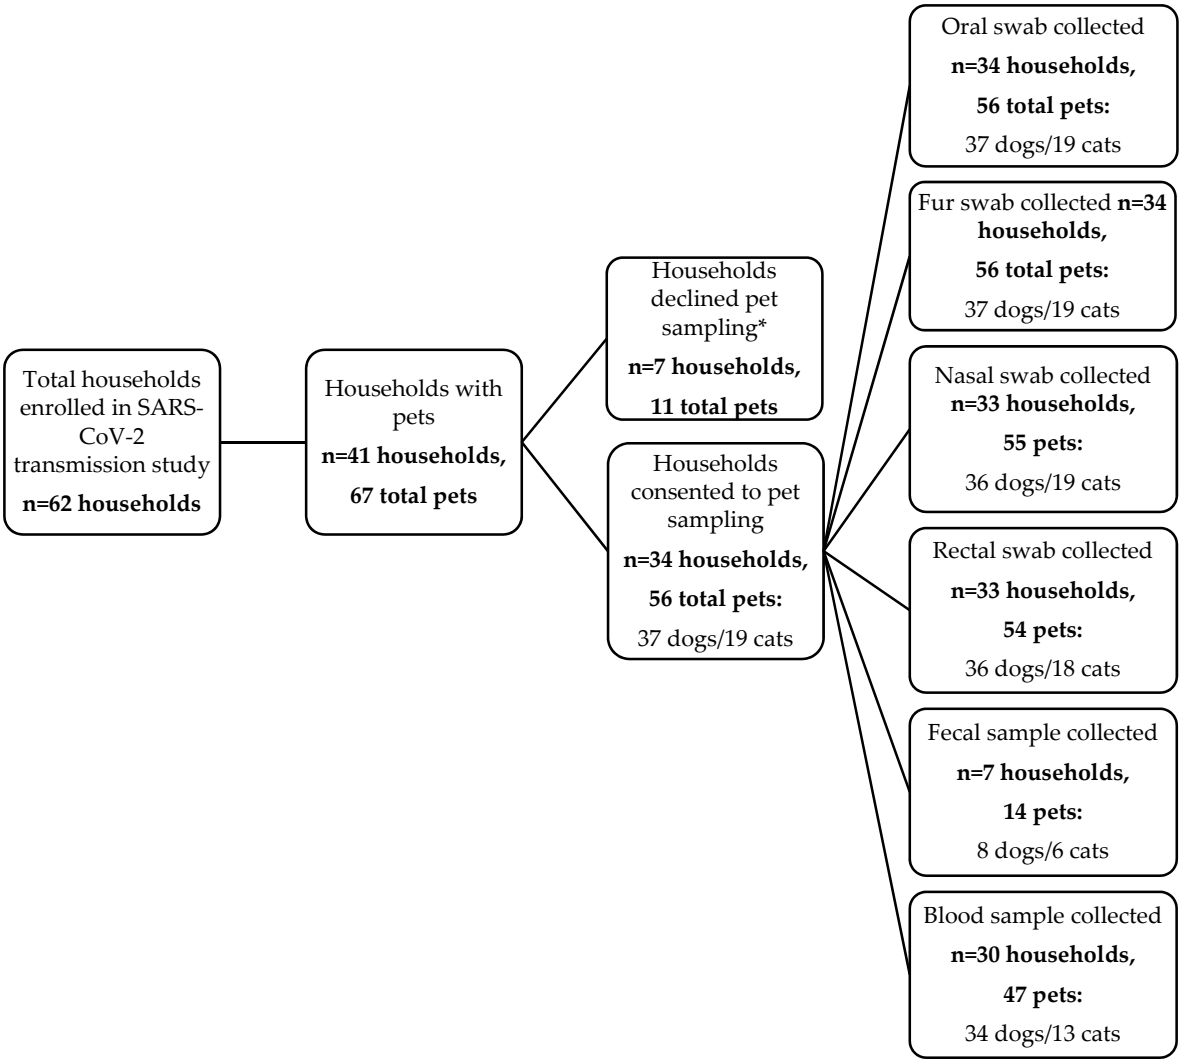

\*Households that declined pet sampling expressed safety concerns for the veterinary field teams due to their pet being fractious.

**Figure S2.** Phylogenetic tree with selected Utah complete genome sequences available (as of July 15, 2020) from Global Initiative on Sharing All Influenza Data, color-coded by subclade (19A – 20C); the seven study sequences are shown in red. All study sequences fell within the 20A subclade with the S: D614G mutation. Branch length denotes time interval.

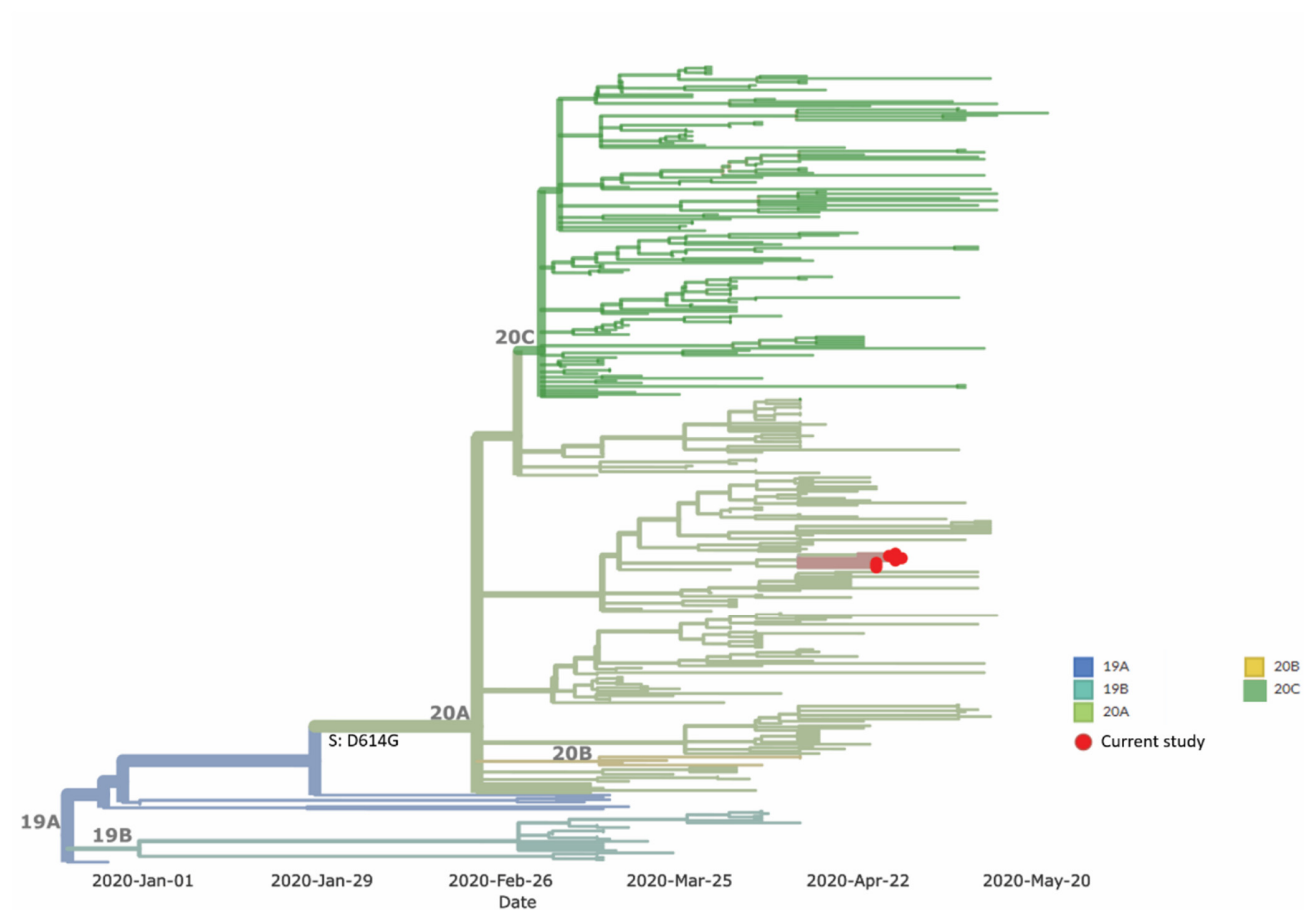

**Table S1:** Information on seropositive pets and their households from the One Health COVID-19 Household Transmission Investigation, April–May 2020

| Household | Pet | Species                                    | Sex * | Age (years) | # days sample(s) was collected after symptom onset of the household index patient | # days sample(s) was collected after household enrollment | Serostatus (days post-enrollment)     | Pre-Existing Condition         | Clinical signs†     | Notes                                                                                                                                                                                                                                                                       |
|-----------|-----|--------------------------------------------|-------|-------------|-----------------------------------------------------------------------------------|-----------------------------------------------------------|---------------------------------------|--------------------------------|---------------------|-----------------------------------------------------------------------------------------------------------------------------------------------------------------------------------------------------------------------------------------------------------------------------|
| 1         | Dog | Australian Shepherd/Labrador Retriever mix | MC    | 2           | 27                                                                                | 21                                                        | Seropositive (1:32)                   | -                              | Decrease d appetite | All three human household members had at least one positive rRT-PCR result on nasopharyngeal swabs and were seropositive.                                                                                                                                                   |
|           | Dog | German Shepherd                            | FS    | 12          | 27                                                                                | 21                                                        | Seronegative                          | -                              | -                   |                                                                                                                                                                                                                                                                             |
|           | Cat | Domestic shorthair                         | FS    | 14          | 27                                                                                | 21                                                        | Seronegative                          | -                              | -                   |                                                                                                                                                                                                                                                                             |
| 2         | Cat | Domestic longhair                          | MC    | 6           | 22, 29*, 33                                                                       | 14, 21*, 25                                               | Seropositive (1:64) on day 14 and 25  | -                              | -                   | All three human household members had at least one positive rRT-PCR result on nasopharyngeal swabs and were seropositive.<br><br>One rectal swab from the 6-year-old female cat was presumptive positive but was not confirmed at NVSL and was negative by virus isolation. |
|           | Cat | Domestic medium-hair                       | FS    | 6           | 22, 29*, 33                                                                       | 14, 21*, 25                                               | Seropositive (1:128) on day 14 and 25 | Prediabetic; history of asthma | -                   |                                                                                                                                                                                                                                                                             |
|           | Dog | Miniature Schnauzer                        | FS    | 12          | 22 and 29                                                                         | 14 and 21                                                 | Seropositive (1:32) on day 14 and 21  | -                              | -                   |                                                                                                                                                                                                                                                                             |
| 3         | Cat | Domestic shorthair                         | MC    | 8           | 31                                                                                | 20                                                        | Seropositive (1:64)                   | -                              | -                   | All five human household members had at least one positive rRT-PCR result on nasopharyngeal swabs and were seropositive.                                                                                                                                                    |
| 4         | Dog | Golden Retriever/Poodle mix                | MC    | 10          | 39                                                                                | 29                                                        | Seropositive (1:32)                   | 15-year history of seizures    | -                   | Four of five human household members had at least one positive rRT-PCR result on nasopharyngeal or nasal swabs and were seropositive; one was seronegative without a positive swab result.                                                                                  |
| 5         | Dog | Pitbull                                    | FS    | 3           | 27                                                                                | 14                                                        | Seropositive (1:32)                   | -                              | Nasal discharge     | Two of four human household members had at least one positive rRT-PCR result on nasopharyngeal or nasal swabs and were seropositive; two were negative on initial swabs and serology, and convalescent specimens were not obtained.                                         |
|           | Dog | Pitbull                                    | MC    | 1           | 27                                                                                | 14                                                        | Seronegative                          | -                              | Nasal discharge     |                                                                                                                                                                                                                                                                             |
| 6         | Cat | Manx                                       | FS    | 8           | 37                                                                                | 14                                                        | Seropositive (1:64)                   |                                |                     | This cat spent at least 50% time outdoors. Only one of five human household members was seropositive; an additional member had positive rRT-PCR results on nasopharyngeal swabs but did not have a convalescent blood specimen.                                             |

\*MC = Male, castrated; FS = Female, spayed

†Clinical signs were reported since onset of illness in the first human case in the household. The duration of clinical signs was unknown.

\*Blood samples were unable to be obtained for these pets on day 21

**Table S2.** Owner-reported clinical signs among household pets enrolled in the COVID-19 Household Transmission Investigation since onset of illness in first household human case, April–May 2020.

| <b>Clinical signs</b>                         | <b>Total<br/>N=56<br/>n (%)</b> | <b>Seropositive<br/>N=8<br/>n (%)</b> | <b>Seronegative<br/>N=39<br/>n (%)</b> | <b>No blood<br/>sample<br/>collected<br/>N=9<br/>n (%)</b> |
|-----------------------------------------------|---------------------------------|---------------------------------------|----------------------------------------|------------------------------------------------------------|
| None                                          | 42 (75)                         | 6 (75)                                | 31 (79)                                | 5 (55)                                                     |
| Any signs reported                            | 14 (25)                         | 2 (25)                                | 8 (21)                                 | 4 (44)                                                     |
| Respiratory                                   | 9 (16)                          | 1 (13)                                | 6 (15)                                 | 3 (33)                                                     |
| Sneezing                                      | 4 (7)                           | 0 (0)                                 | 2 (5)                                  | 2 (22)                                                     |
| Coughing                                      | 4 (7)                           | 0 (0)                                 | 2 (5)                                  | 2 (22)                                                     |
| Nasal discharge                               | 3 (5)                           | 1 (13)                                | 2 (5)                                  | 0 (0)                                                      |
| Difficulty breathing / shortness<br>of breath | 1 (2)                           | 0 (0)                                 | 1 (3)                                  | 0 (0)                                                      |
| Gastrointestinal                              | 3 (5)                           | 0 (0)                                 | 3 (8)                                  | 0 (0)                                                      |
| Vomiting                                      | 1 (2)                           | 0 (0)                                 | 1 (3)                                  | 0 (0)                                                      |
| Diarrhea                                      | 2 (4)                           | 0 (0)                                 | 2 (5)                                  | 0 (0)                                                      |
| Other                                         | 2 (4)                           | 1 (13)                                | 0 (0)                                  | 1 (11)                                                     |
| Inappetence                                   | 1 (2)                           | 1 (13)                                | 0 (0)                                  | 0 (0)                                                      |
| Lethargy                                      | 1 (2)                           | 0 (0)                                 | 0 (0)                                  | 1 (11)                                                     |
